# Supplementary material for: Conformational ensembles of neuromedin C reveal a progressive coil-helix transition within a binding-induced folding mechanism
Source: Royal Society of Chemistry journal article supplement (doi:10.1039/c5ra12753j), 2015-01-01
Supplement: c5ra12753j1.pdf [file c5ra12753j1.pdf]

Supplementary Information for

***Conformational ensembles of neuromedin C reveal a progressive coil-helix transition within a binding-induced folding mechanism***

Miquel Adrover<sup>\*a,b</sup>, Pilar Sanchis<sup>a,b</sup>, Bartolomé Vilanova<sup>a,b</sup>, Kris Pauwels<sup>c,d</sup>, Gabriel Martorell<sup>e</sup> and Juan Jesús Pérez<sup>f</sup>

<sup>a</sup>Institut Universitari d'Investigació en Ciències de la Salut (IUNICS). Departament de Química, Universitat de les Illes Balears, Ctra. Valldemossa km 7.5, E-07122 Palma de Mallorca, Spain.

<sup>b</sup>Instituto de Investigación Sanitaria de Palma (IDISPA), Ctra. Valldemossa, 79, E-07010, Palma de Mallorca, Spain.

<sup>c</sup>Structural Biology Brussels, Vrije Universiteit Brussels, Pleinlaan 2, 1050 Brussels, Belgium.

<sup>d</sup>VIB Structural Biology Research Centre, Vlaams Instituut voor Biotechnologie, Pleinlaan 2, 1050 Brussels, Belgium.

<sup>e</sup>Serveis Científico-Tècnics, Universitat de les Illes Balears, Ctra. Valldemossa km 7.5, E-07122 Palma de Mallorca, Spain.

<sup>f</sup>Departament d'Enginyeria Química, Universitat Politècnica de Catalunya, ETSEIB, Av. Diagonal, 647; E-08028 Barcelona, Spain

\*Correspondence to: Miquel Adrover, University of Balearic Islands,  
Phone: 0034 971 173491; Fax 0034 971 1732;  
e-mail: miquel.adrover@uib.es

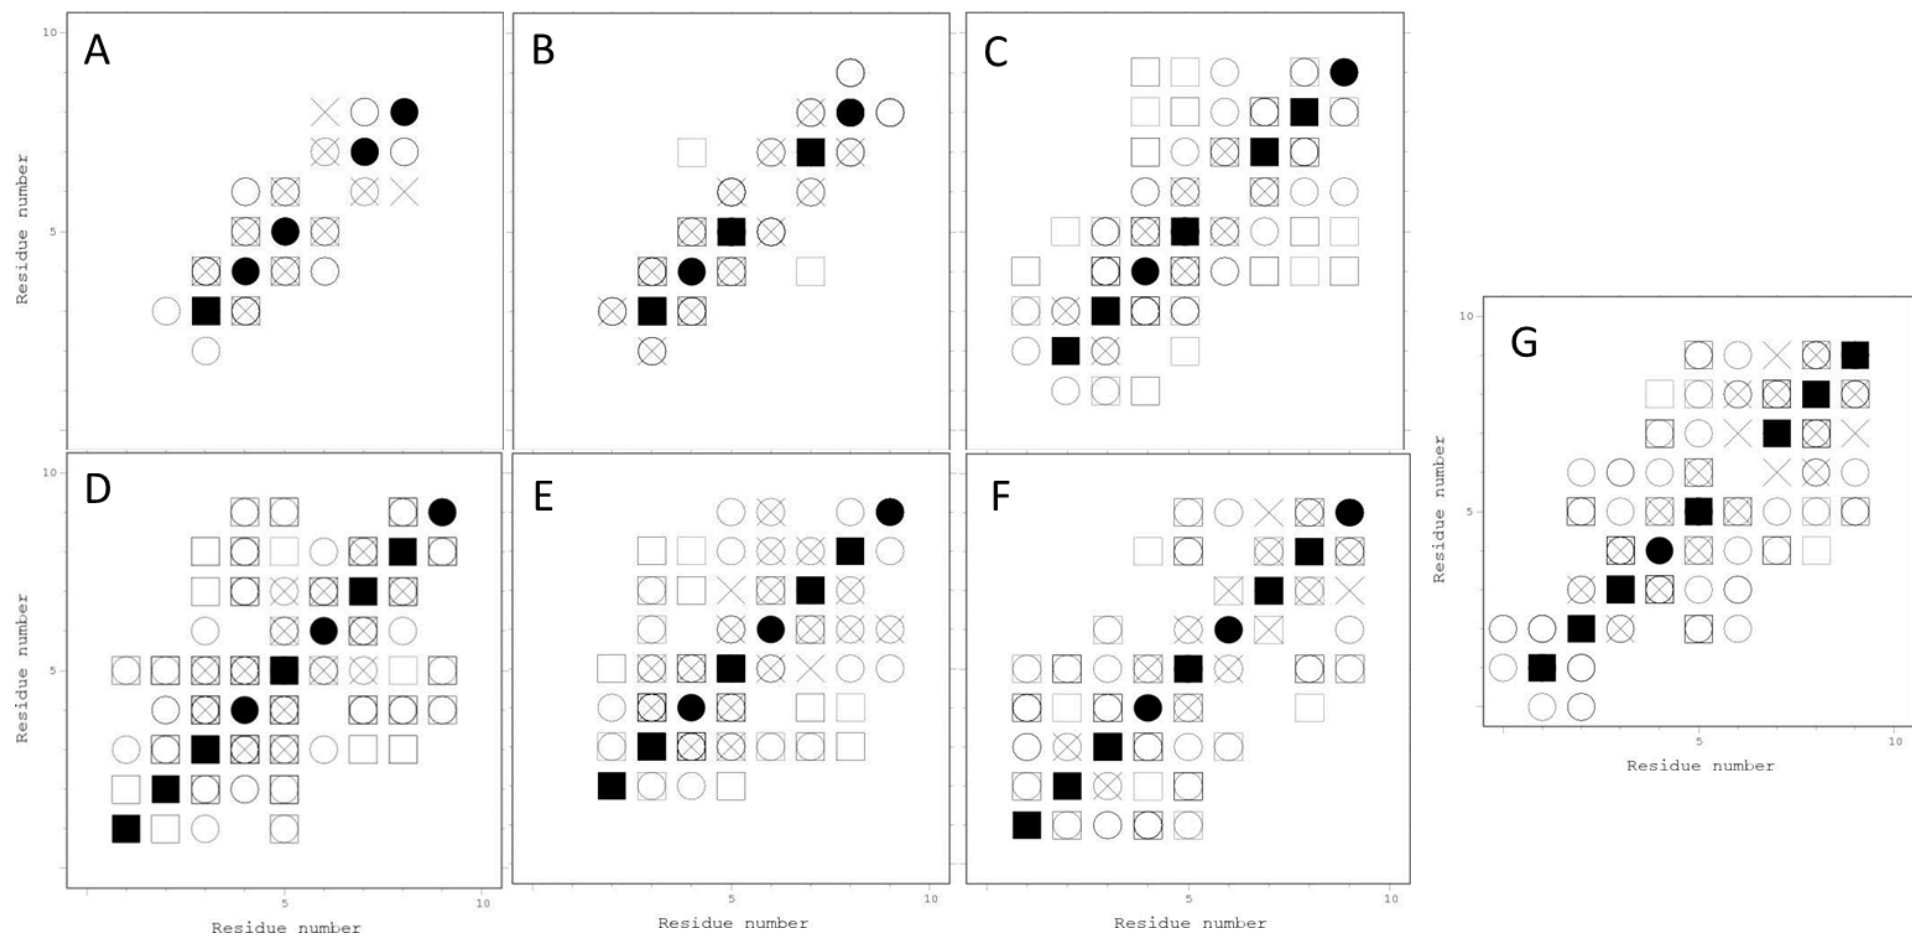

**Figure S1.** Contact maps for NMC structures calculated in the presence of (A) 0%, (B) 10%, (C) 25%, (D) 40%, (E) 60% and (F) 90% d<sub>3</sub>-TFE, and in the presence of (G) 150mM d<sub>25</sub>-SDS. The geometrical restraints yielding these contact maps were taken from the <sup>1</sup>H,<sup>1</sup>H NOEs intensities using an automatic assignment process. X represents backbone-backbone interactions;  $\blacksquare$  represents backbone-side chain interactions (filled if intraresidue);  $\square$  represents side chain-side chain interactions (filled if intraresidue). The contact maps plots were obtained analyzing the solution structure through the Protein Structure Validation Server (PSV) ([http://psvs-1\\_4-dev.nesg.org/](http://psvs-1_4-dev.nesg.org/)).<sup>69</sup>

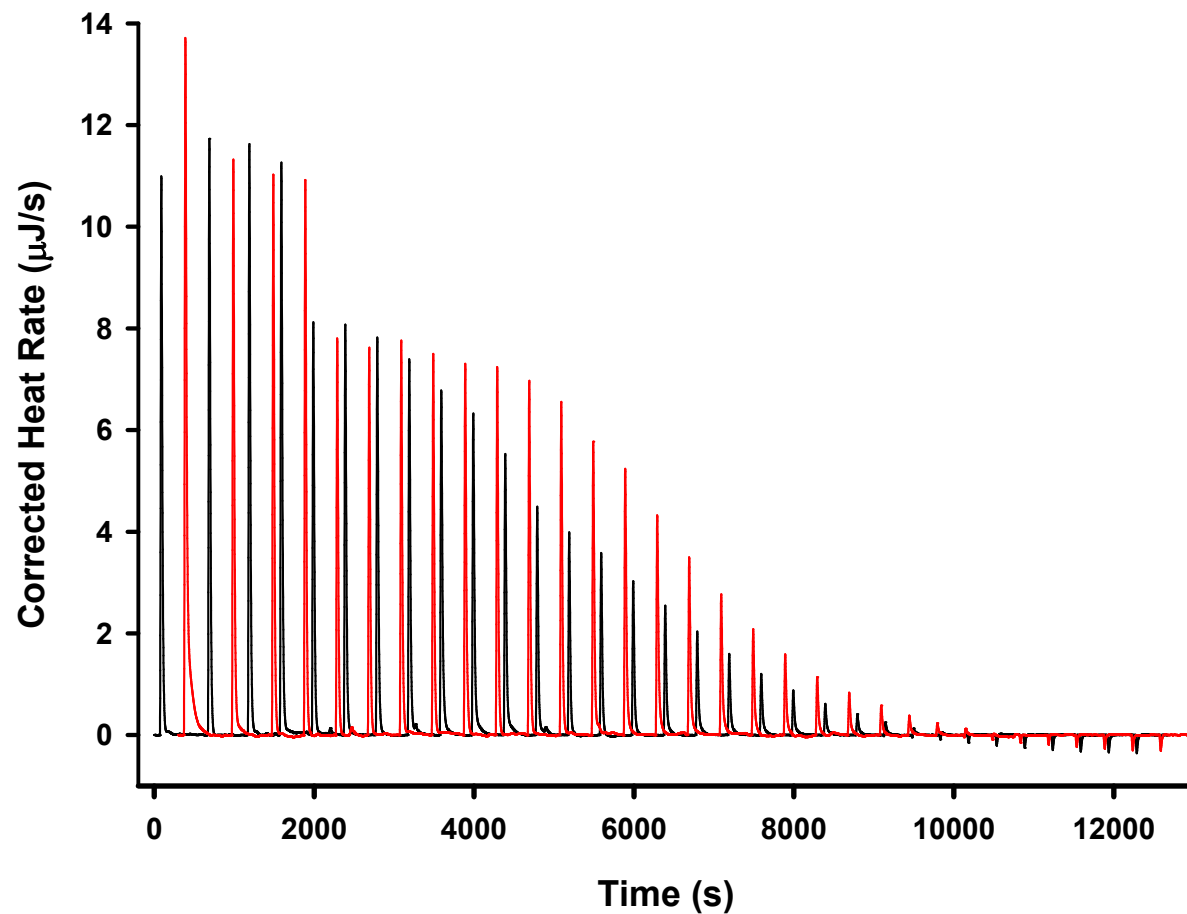

**Figure S2.** Heat flow versus time profiles resulting from injection of  $2\mu\text{l}$  (the first four injections) or  $1.5\mu\text{l}$  (the other injections) aliquots of a  $10\text{mM}$  acetate buffered solution (pH 4.0) of SDS at  $35\text{mM}$  concentration into a  $171\mu\text{l}$  reaction cell containing a  $10\text{mM}$  acetate buffer solution either alone (*black*) or in presence of  $42\mu\text{M}$  of NMC (*red*). The titration plot representing the experiment carried out on NMC has been shifted on the graph  $300\text{s}$  towards higher injection times to have a better comparison between both plots.

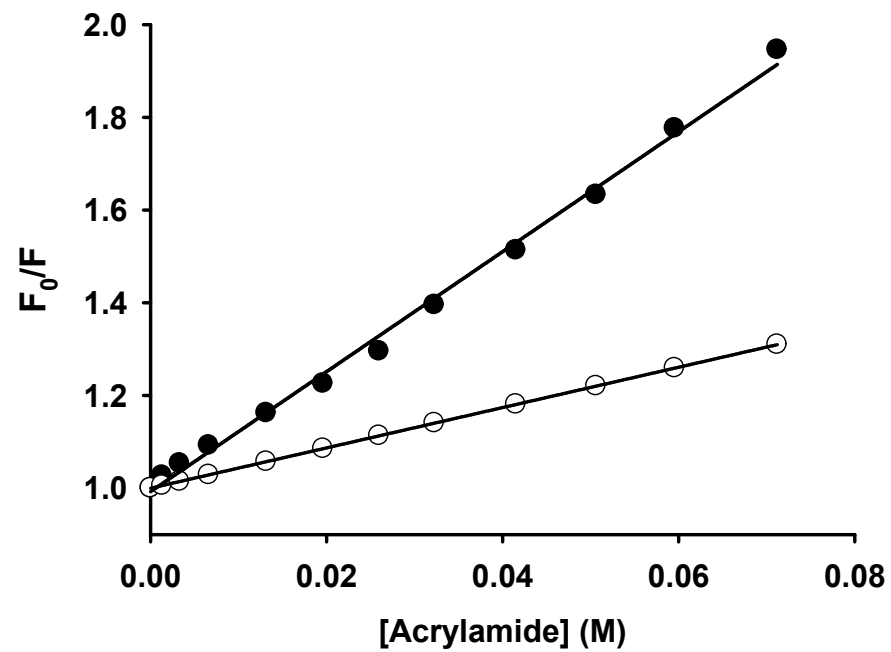

**Figure S3.** Stern-Volmer plots for the quenching of a 0.1mM NMC buffered solution solution alone (●) and in presence of 50mM SDS (□).  $F$  and  $F_0$  are the fluorescence intensities in the presence and absence of acrylamide, respectively ( $\lambda_{exc}$  280nm;  $\lambda_{em}$  356nm in ● and  $\lambda_{em}$  345nm in □).

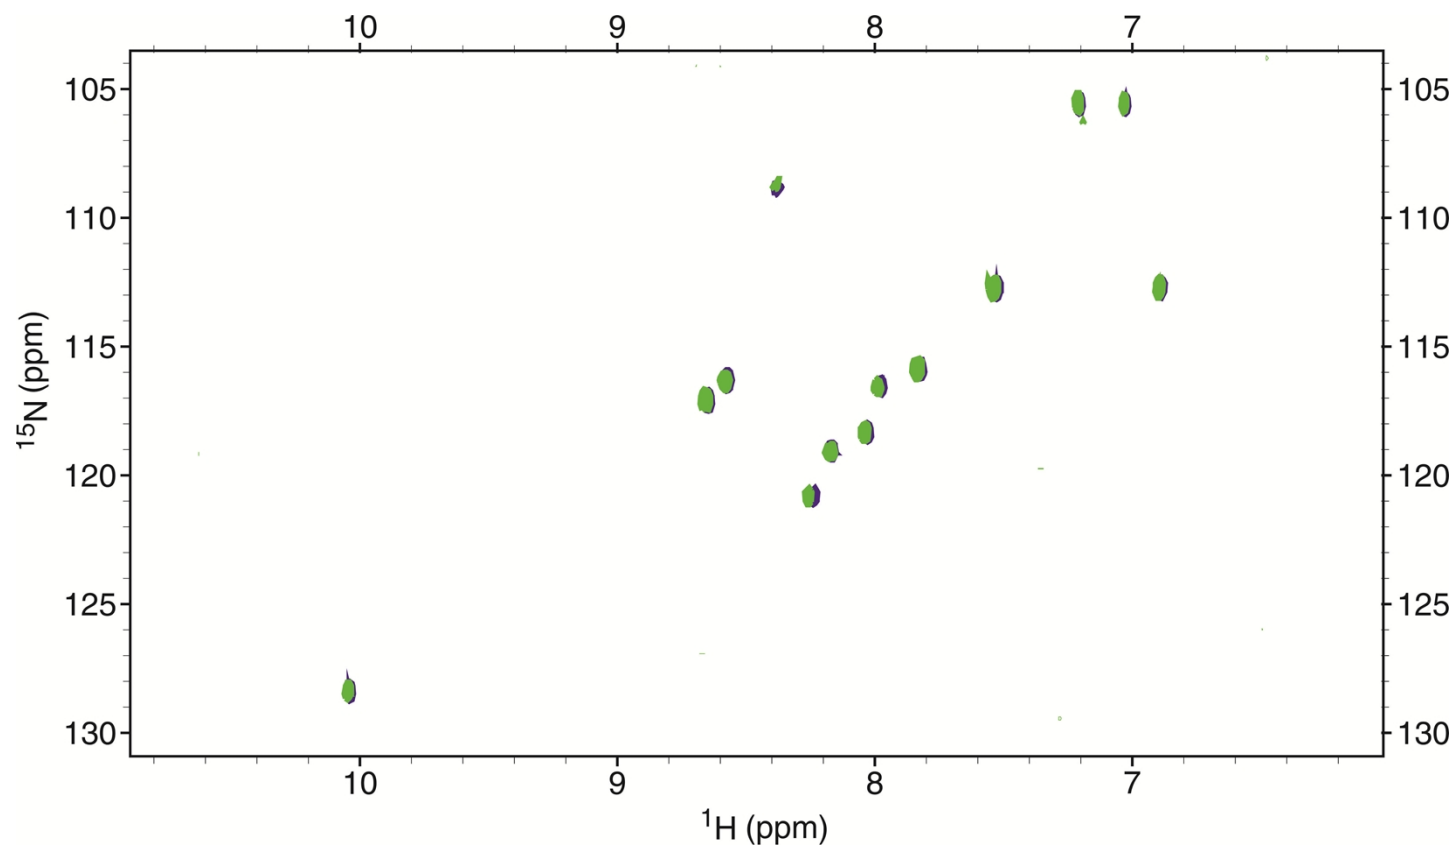

**Figure S4.** Overlapping of the  $^{15}\text{N}$ -HSQC spectra of NMC recorded at  $15^\circ\text{C}$  in 10mM acetate buffer (pH 4.0) in presence of 150mM  $\text{d}_2\text{-SDS}$  (*blue*) and in presence of 50mM SDS (*green*).

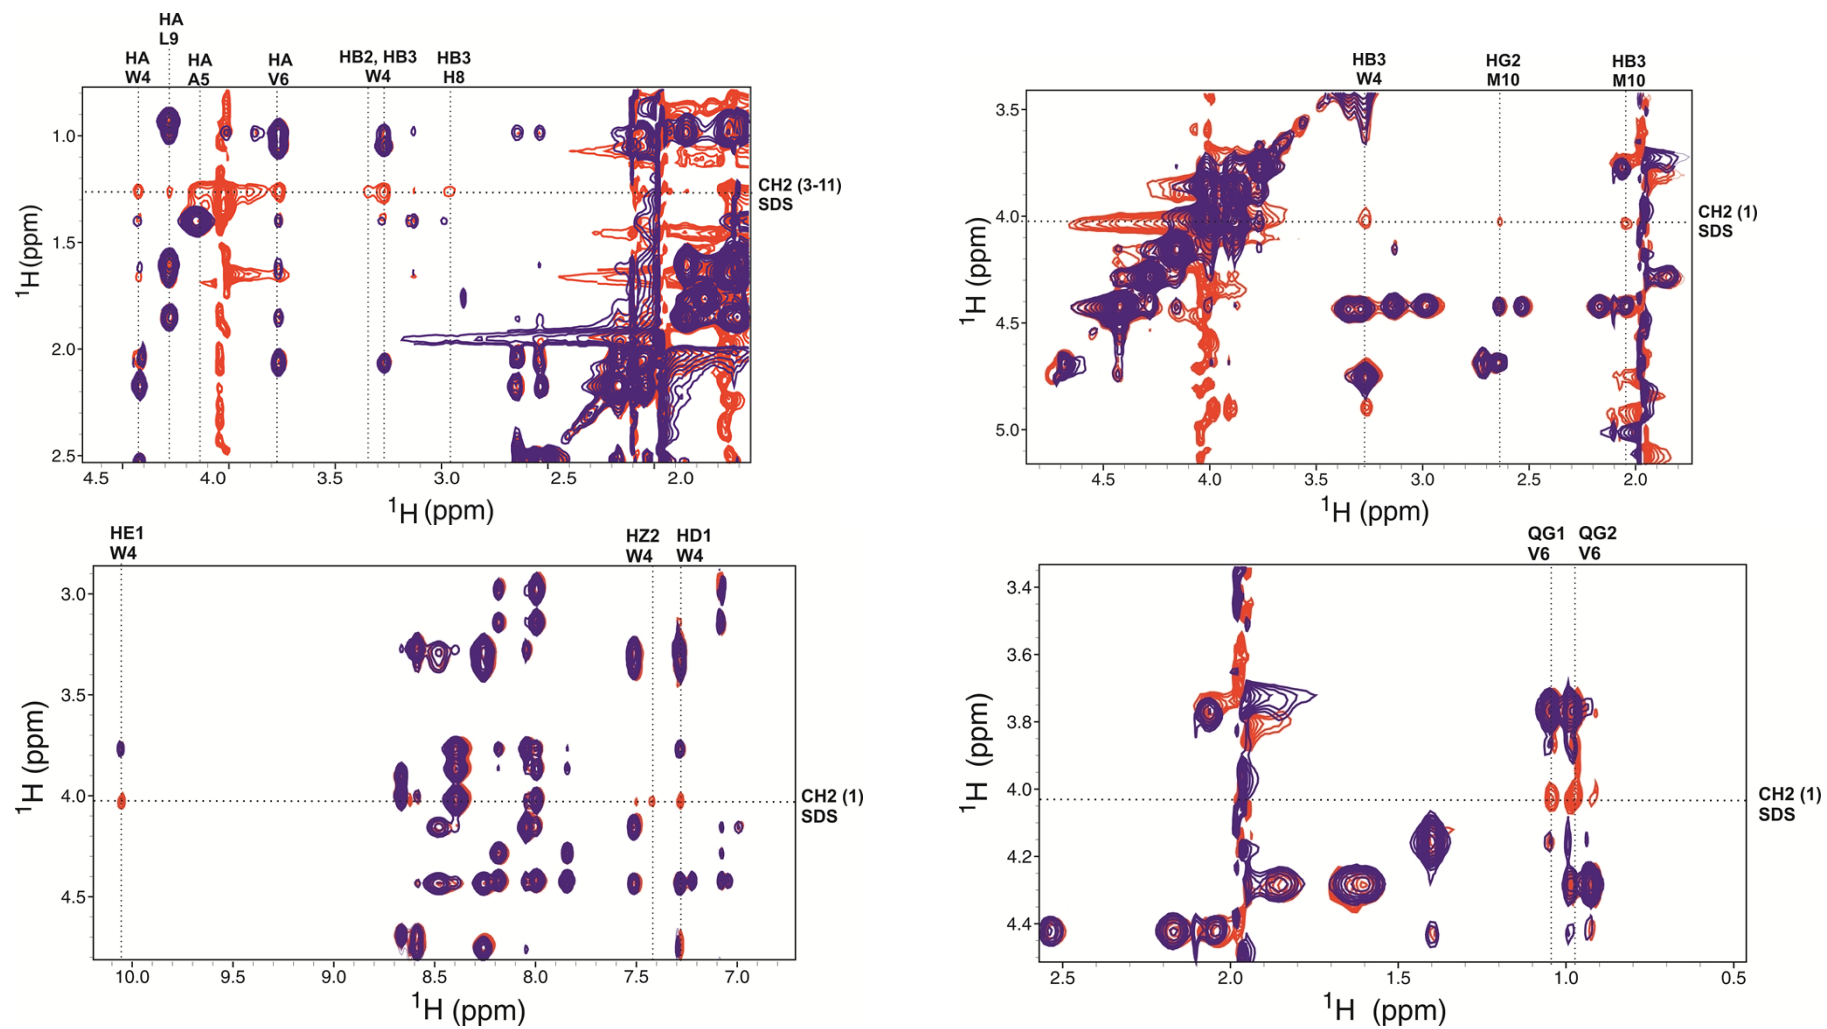

**Figure S5.** Overlap of the  $^1\text{H}$ ,  $^1\text{H}$ -NOESY spectra of NMC at different spectral regions when NMC was bound to SDS micelles (*red*) and when it was bound to  $d_{25}$ -SDS micelles (*blue*).

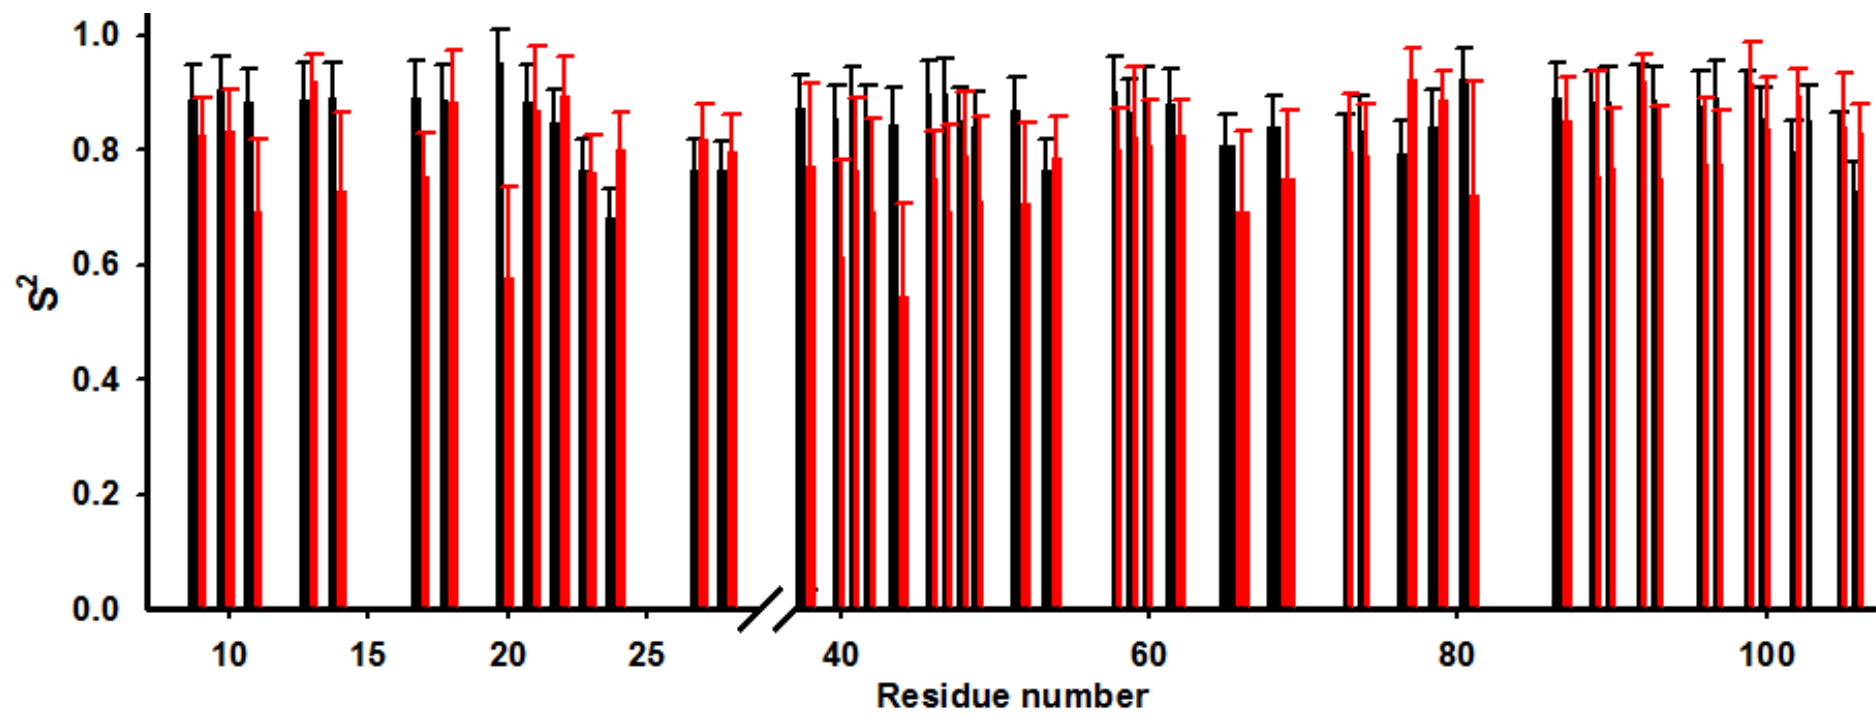

**Figure S6.** Generalized order parameters ( $S^2$ ) of CyaY in 25mM Tris-HCl buffer at pH 8.3 (*black bars*) and in hen egg white (*red bars*) as a function of the residue number.  $S^2$  values were calculated using previously published  $R_1$ ,  $R_2$  and HET-NOE data<sup>59</sup> by applying the Liparizi-Szabo model-free analysis.

**Table S1.** Secondary structure contents of NMC at different TFE percentages estimated from the corresponding CD spectrum acquired in 10mM acetate buffer (pH 4.0) at 15°C.

| <b>% TFE</b> | <b>% Helix<sup>a</sup></b> | <b>% Antiparallel <math>\beta</math>-sheet<sup>a</sup></b> | <b>% Turns<sup>a</sup></b> | <b>% Random Coil<sup>a</sup></b> |
|--------------|----------------------------|------------------------------------------------------------|----------------------------|----------------------------------|
| <b>0</b>     | 3.4                        | 35.6                                                       | 10.7                       | 50.3                             |
| <b>10</b>    | 3.8                        | 33.8                                                       | 12                         | 50.4                             |
| <b>25</b>    | 10.6                       | 29.6                                                       | 11.2                       | 48.6                             |
| <b>40</b>    | 26.8                       | 21.8                                                       | 7.0                        | 44.7                             |
| <b>60</b>    | 37.3                       | 17.1                                                       | 3.9                        | 41.8                             |
| <b>90</b>    | 44.3                       | 10.9                                                       | 7.2                        | 37.6                             |
| <b>SDS</b>   | 36.8                       | 23.2                                                       | 0.0                        | 40.0                             |

<sup>a</sup> The secondary structure contents were estimated by using the BeStSel on-line platform (<http://bestsel.elte.hu/>)



**Table S2.** Residue-specific dynamics parameters calculated from the Lipari-Szabo model-free formalism at 14.1T for NMC in 10mM acetate buffer at pH 4.0 and 15°C.

| <b>Residue</b> | <b>Model</b> | $\chi^2$ | $S^2$     | $\tau_e$ , ps |
|----------------|--------------|----------|-----------|---------------|
| <b>2</b>       | 2            | 2.76     | 0.23±0.03 | 80±16         |
| <b>3</b>       | 2            | 0.19     | 0.37±0.03 | 173±31        |
| <b>4</b>       | 2            | 0.055    | 0.47±0.02 | 137±22        |
| <b>5</b>       | 2            | 0.082    | 0.62±0.01 | 22±7          |
| <b>6</b>       | 2            | 0.117    | 0.48±0.02 | 80±9          |
| <b>7</b>       | 2            | 0.054    | 0.54±0.01 | 82±10         |
| <b>8</b>       | 2            | 0.178    | 0.53±0.02 | 50±9          |
| <b>9</b>       | 2            | 0.093    | 0.41±0.02 | 60±7          |
| <b>10</b>      | 2            | 0.651    | 0.37±0.02 | 140±15        |

**Table S3.** Residue-specific dynamics parameters calculated from the Lipari-Szabo model-free formalism at 14.1T and 15°C for a NMC solution containing 60% TFE and 40% acetate buffer (10mM) at pH 4.0.

| Residue                                | Model | $\chi^2$ | $S^2$     | $\tau_e$ , ps | $R_{ex}$ , s <sup>-1</sup> | $S_f^2$ <sup>a</sup> |
|----------------------------------------|-------|----------|-----------|---------------|----------------------------|----------------------|
| <b>3</b>                               | 4     | 0.14     | 0.68±0.15 | 510±110       | 3.65±0.67                  | -                    |
| <b>4</b>                               | 2     | 0.31     | 0.74±0.01 | 112±15        | -                          | -                    |
| <b>5</b>                               | 2     | 0.83     | 0.79±0.02 | 71±16         | -                          | -                    |
| <b>6</b>                               | 2     | 1.58     | 0.68±0.01 | 98±12         | -                          | -                    |
| <b>7</b>                               | 2     | 2.85     | 0.75±0.01 | 59±12         | -                          | -                    |
| <b>8</b>                               | 2     | 0.006    | 0.75±0.02 | 99±17         | -                          | -                    |
| <b>9</b>                               | 5     | 0.000    | 0.43±0.10 | 1190±322      | -                          | 0.89±0.02            |
| <b>10</b>                              | 5     | 0.000    | 0.42±0.06 | 694±167       | -                          | 0.85±0.02            |
| <sup>a</sup> $S^2 = S_f^2 \cdot S_s^2$ |       |          |           |               |                            |                      |

**Table S4.** Residue-specific dynamics parameters calculated from the Lipari-Szabo model-free formalism at 14.1T for NMC under its SDS micelle bound state, at pH 4.0 and 15°C.

| Residue                                | Model | $\chi^2$ | $S^2$     | $\tau_c$ , ps | $R_{ex}$ , s <sup>-1</sup> | $S_f^2$ <sup>a</sup> |
|----------------------------------------|-------|----------|-----------|---------------|----------------------------|----------------------|
| 2                                      | 5     | 0.00     | 0.43±0.06 | 743±173       | -                          | 0.79±0.07            |
| 3                                      | 1     | 3.90     | 0.84±0.04 | -             | -                          | -                    |
| 4                                      | 1     | 4.40     | 0.86±0.07 | -             | -                          | -                    |
| 5                                      | 4     | 0.00     | 0.64±0.06 | 64±35         | 6.0±2.6                    | -                    |
| 6                                      | 1     | 5.00     | 0.87±0.06 | -             | -                          | -                    |
| 7                                      | 1     | 3.50     | 0.86±0.07 | -             | -                          | -                    |
| 8                                      | 3     | 3.11     | 0.93±0.07 | -             | 2.1±0.9                    | -                    |
| 9                                      | 1     | 0.82     | 0.79±0.06 | -             | -                          | -                    |
| 10                                     | 2     | 0.00     | 0.77±0.02 | 597±356       | -                          | -                    |
| <sup>a</sup> $S^2 = S_f^2 \cdot S_s^2$ |       |          |           |               |                            |                      |
